# Supplementary material
Source: publisher site journal article supplement (http://static.cambridge.org/content/id/urn:cambridge.org:id:article:S1368980019001514/resource/name/S1368980019001514supp001.xlsx)
Supplement: Supplementary file 1 [file S1368980019001514supp001.xlsx]

## Sheet: 食品群別
Table Food intake according to contribution of ultra-processed food
men	Contribution of ultra-processed food												p value	multiple comparison ll	p for trend
	①High(n=54）				②Middle（n=43）				③Low（n=70）
Rice	345.832	±	20.8393		415.245	±	23.3673		433.891	±	18.3467		0.00607375	①＜③	0.00188905
Other cereal grains	182.544	±	14.3113		163.606	±	16.0474		131.326	±	12.5995		0.0265041	①＞③	0.00822683
Vegetables	232.59	±	16.2748		269.407	±	18.2491		240.014	±	14.3282		0.290896
Brightly colored vegetables	96.821	±	11.7504		107.022	±	13.1758		88.565	±	10.3449		0.547078
Other vegetables	120.493	±	9.3438		149.793	±	10.4773		135.51	±	8.22616		0.114446
Beans	44.512	±	6.73126		48.61	±	7.54783		51.108	±	5.92611		0.76408
Roots†	1.265	±	0.768512		0.576	±	0.861739		2.028	±	0.676587		0.729737
Seaweed†	8.842	±	2.2569		15.68	±	2.53068		13.164	±	1.98694		0.174785
Potatoes	42.4	±	4.86771		42.212	±	5.4582		35.134	±	4.28546		0.447342
Mushrooms	6.05246	±	1.544		11.9992	±	1.732		7.82564	±	1.36		0.0343681	①＜②	0.392
Eggs	27.913	±	3.79305		30.842	±	4.25318		35.211	±	3.33935		0.348361
Fish	55.326	±	6.7965		49.748	±	7.62098		82.842	±	5.98355		0.000862871	①,②＜③	0.00287647
Meat	100.172	±	6.19844		101.08	±	6.95037		98.977	±	5.45703		0.971028
Dairy products	73.624	±	12.4751		65.255	±	13.9884		52.461	±	10.9829		0.439292
Fruits†	50.254	±	11.5818		40.014	±	12.9868		59.223	±	10.1965		0.267039
Sweets†	20.493	±	3.68999		15.923	±	4.13762		8.564	±	3.24862		0.156466
Fat and oils	15.278	±	1.02134		13.954	±	1.14524		13.806	±	0.899176		0.522487
Sugar †	5.844	±	0.729122		4.919	±	0.817571		5.314	±	0.641909		0.685787
Seasoning	119.364	±	12.3704		153.908	±	13.871		119.221	±	10.8907		0.102992
Alcohol†	236.727	±	56.1478		204.278	±	62.9591		267.677	±	49.4318		0.21665
Other beverages	403.712	±	42.9112		340.979	±	48.1168		318.03	±	37.7785		0.319261
women	Contribution of ultra-processed food												p value	multiple comparison ll	p for trend
	①High（n=76）				②Middle（n=84）				③Low（n=60）
Rice	270.045	±	12.5898		249.791	±	11.9609		281.617	±	14.1761		0.211838
Other cereal grains†	146.29	±	9.79087		149.297	±	9.30179		123.542	±	11.0245		0.170385
Vegetables	230.841	±	13.1439		260.369	±	12.4873		293.236	±	14.8		0.00802332	①＜③	0.00193107
Brightly colored vegetables	88.833	±	9.47751		104.919	±	9.00409		121.574	±	10.6717		0.0751351
Other vegetables	132.092	±	8.08842		143.779	±	7.68439		156.695	±	9.10757		0.134263
Beans†	45.405	±	7.1419		50.551	±	6.78515		56.234	±	8.04178		0.0027081	①＜②,③	0.0086776
Roots†	0.579	±	0.501148		2.675	±	0.476115		2.18	±	0.564293		0.00103209	①＜②,③	0.00772162
Seaweed†	5.651	±	1.72466		11.666	±	1.63851		14.633	±	1.94197		＜0.001	①＜②,③	＜0.001
Potatoes	39.362	±	4.85024		37.495	±	4.60796		47.3	±	5.46137		0.36855
Mushrooms†	10.13	±	1.9906		14.322	±	1.89116		15.83	±	2.24142		0.143141
Eggs	27.561	±	2.76858		27.019	±	2.63028		33.595	±	3.11742		0.226647
Fish	52.668	±	4.83993		63.421	±	4.59817		53.133	±	5.44976		0.201353
Meat	79.409	±	4.73452		77.257	±	4.49802		89.465	±	5.33107		0.195359
Dairy products	89.143	±	11.9573		111.381	±	11.36		129.138	±	13.4639		0.0847857
Fruits†	57.891	±	9.76732		73.24	±	9.27943		87.927	±	10.998		0.00632058	①＜③	0.00201511
Sweets	36.51	±	3.88728		30.201	±	3.6931		21.64	±	4.37708		0.0426468	①＞③	0.012
Fat and oils	14.104	±	0.780124		11.928	±	0.741155		11.985	±	0.87842		0.0868483
Sugar †	5.201	±	0.734802		5.293	±	0.698097		7.206	±	0.827388		0.074434
Seasoning	79.794	±	6.91469		83.3	±	6.56929		97.575	±	7.78595		0.208252
Alcohol†	53.757	±	20.324		92.345	±	19.3087		98.923	±	22.8848		0.0746462
Other beverages	433.39	±	39.8323		444.955	±	37.8426		417.094	±	44.8512		0.894132
＊ Values are trimmed mean±SE
† 正規分布ではなかったため、対数変換した値を求め、一元配置分散分析及び、共分散分析を行った。表には対数変換前の粗値を示した。
§Adjusted for age,family structure,energy.
ll For categorical variables,multiple comparison was used Bonferroni. 「＞」shows intake size.

## Sheet: 詳細な利用内容（利用者割合）
Table Detail use content according to contribution of ultra-processed food (rate)
Men	Contribution of ultra-processed food
	①High（n=54）				②Middle（n=44）				③Low（n=71）				p value
【Lunch】
Lunch†
利用なし	36	（	66.7	）	37	（	84.1	）	69	（	97.2	）	＜0.001
利用あり	18	（	33.3	）	7	（	15.9	）	2	（	2.8	）
【Staple food】
Rice ball†
利用なし	38	（	70.4	）	38	（	86.4	）	70	（	98.6	）	＜0.001
利用あり	16	（	29.6	）	6	（	13.6	）	1	（	1.4	）
Dressed bread†
利用なし	38	（	70.4	）	37	（	84.1	）	70	（	98.6	）	＜0.001
利用あり	16	（	29.6	）	7	（	15.9	）	1	（	1.4	）
Lamian‡
利用なし	45	（	83.3	）	39	（	88.6	）	71	（	100	）	＜0.001
利用あり	9	（	16.7	）	5	（	11.4	）	0	（	0	）
【Side dish】
Croquette‡
利用なし	47	（	87	）	41	（	93.2	）	70	（	98.6	）	0.03
利用あり	7	（	13	）	3	（	6.8	）	1	（	1.4	）
【Seasoning】
Integral seasoning †
利用なし	23	（	42.6	）	14	（	31.8	）	42	（	59.2	）	0.013
利用あり	31	（	57.4	）	30	（	68.2	）	29	（	40.8	）
Women	contribution of ultra-processed food
	①High（n=77）				②Middle（n=86）				③Low（n=60）				p value
【Lunch】
Lunch†
利用なし	58	（	75.3	）	84	（	97.7	）	60	（	100	）	＜0.001
利用あり	19	（	24.7	）	2	（	2.3	）	0	（	0	）
【Staple food】
Dressed bread†
利用なし	57	（	74	）	73	（	84.9	）	57	（	95	）	0.004
利用あり	20	（	26	）	13	（	15.1	）	3	（	5	）
Chinese-style noodles†
利用なし	67	（	87	）	75	（	87.2	）	60	（	100	）	0.014
利用あり	10	（	13	）	11	（	12.8	）	0	（	0	）
Spaghetti‡
利用なし	69	（	89.6	）	80	（	93	）	60	（	100	）	0.025
利用あり	8	（	10.4	）	6	（	7	）	0	（	0	）
【Sweets】
Sweetened bun・pie・anman†
利用なし	54	（	70.1	）	70	（	81.4	）	58	（	96.7	）	＜0.001
利用あり	23	（	29.9	）	16	（	18.6	）	2	（	3.3	）
Snack†
利用なし	65	（	84.4	）	75	（	87.2	）	59	（	98.3	）	0.025
利用あり	12	（	15.6	）	11	（	12.8	）	1	（	1.7	）
【Seasoning】
Integral seasoning†
利用なし	26	（	33.8	）	19	（	22.1	）	34	（	56.7	）	＜0.001
利用あり	51	（	66.2	）	67	（	77.9	）	26	（	43.3	）
Values are n (％)
三次加工食品エネルギー寄与率3群のうちいずれかで、利用者割合が10％以上であった項目で、分布の割合の差の検定を行った。
† χ2 test.
‡ Fisher's exact test.

## Sheet: table4
Table4 BMI according to contribution of ultra-processed foods
		Contribution of ultra-processed food (% of total energy)												p for trend
		①Low				②Middle				③High
Men		(n=42 )				(n=40 )				(n=37 )
	BMI (kg/m2) Mean (SD)*	23.214	(	0.438	)	24.14	(	0.446	)	23.542	(	0.477	)
	Mean difference(95%CI) in BMI kg/m2
	Crude*	0	(	Reference	)	0.6	(	-0.6,1.8	)	-0.2	(	-1.5,1.0	)	0.73
	Maltivariate†	0	(	Reference	)	0.9	(	-0.3,2.2	)	0.2	(	-1.1,1.5	)	0.748
	Odd ratio(95%CI)for being overweight
	Crude*	1	(	Reference	)	2	(	0.78,5.14	)	0.93	(	0.33,2.65	)	0.964
	Maltivariate†	1	(	Reference	)	2.867	(	1.00,8.18	)	1.06	(	0.32,3.44	)	0.792
Women
		(n=41 )				(n=42 )				(n=44 )
	BMI (kg/m2) Mean (SD)*	20.793	(	0.504	)	21.378	(	0.5	)	22.411	(	0.488	)
	Mean difference(95%CI) in BMI kg/m2
	Crude*	0	(	Reference	)	0.7	(	-0.7,2.1	)	1.6	(	0.2,3.1	)	0.025
	Maltivariate†	0	(	Reference	)	0.6	(	-0.8,1.9	)	1.6	(	0.1,3.0	)	0.026
	Odd ratio(95%CI)for being overweight
	Crude*	1	(	Reference	)	2.3	(	0.54,9.80	)	4.96	(	1.28,19.16	)	0.015
	Maltivariate†	1	(	Reference	)	2.27	(	0.38,13.44	)	5.89	(	1.17,29.64	)	0.02
BMI:body mass index.
CI:confidence interval.
Underweiht：BMI＜18.5,Normal：18.5≧BMI＜25.0,Overweight：BMI≧25.0.(The Japan Society for the Study of Obesity (JASSO))
*The BMI calculated it about the person who replied it when "I measured and filled in height, the weight"
127 in men, 140 in women.
† Analyses of covariance.Modelsadjusted for age,total energy,marital status,income,exercise habits,smoking status.
8 men and 13 women has missing values on marital status and/or income. Finally, 246 participants (119 men, 127 women) were analysed.

## Sheet: 利用品目
Supplementary table Detail use content（time/day） according to contribution of ultra-processed foods
	Contribution of ultra-processed food (% of total energy)
	r†	p value
Total number	0.397	＜0.001
Staple food	0.47	＜0.001
Bentou:One plate meal	0.313	＜0.001
Drink	0.304	＜0.001
Sweets	0.21	＜0.001
Main dish	0.168	0.002
Milk and Dairy Products	0.13	0.017
Seasoning	-0.126	0.021
Side dish	0.086	0.117
Soup	0.054	0.323
†Partial correlation.Adjusted for age,sex,total energy,marital status,income.
35 participants has missing values in marital status and/or income, adjusted analyses included 341individuals.

## Sheet: Supplementary table1
Supplementary Table1. NOVA food classification system† and examples in Japanese diet
Food group	Definition		Examples in Japanese diet
Group1 Unprocessed or minimally processed foods	Unprocessed foods are parts of plants (leaves, stems, roots, tubers, fruits, nuts, seeds), or animal (meat, other flesh, tissue and organs, eggs, milk), shortly after harvesting, gathering, slaughter orhusbanding. Minimally processed foods are unprocessed foods altered in ways that do not adding or introducing any substance, but that may involve subtracting parts of the food in ways that do not s…		Grains (e.g. rice, flours); fresh, chilled, frozen meats, poultry, fish, seafood, eggs; fresh and dried beans and other legumes (pulses), fresh roots and tubers, fresh, dried fungi; fresh, chilled, frozen vegetables and fruits; fermented milk such as plain yoghurt; teas, coffee.
Group2 Processed culinary ingredients	Processed culinary ingredients are food products extracted and purified by industry from constituents of foods, or else obtained from nature, such as salt. Specific processes include pressing, milling, pulverizing. Stabilizing or ‘purifying’ agents and other additives may also be used. The purpose of such processes is to make durable products that are suitable for use in home and restaurant kitch…		Plant oils, sugar; vinegar; shoyu (soy sauce); miso (fermented soybean paste); mirin (sweet sake used as seasoning).
Group3 Processed foods	Manufactured by adding culinary ingredients like oil, sugar or salt to foods from the Group 1. Directly derived from foods and recognizable as versions of the original foods. Generally produced to be consumed as part of meals or dishes. Processes include canning and bottling using oils, sugars or syrups, or salt, and methods of preservation such as salting, salt-pickling, smoking, and curing. The…		udon (boiled or dried udon wheat noodles), steamed or dried wheat noodles; processed meat and fish such as ham, bacon, tuna, chikuwa (cake of fish paste); processed soy beans such as tofu (bean curd), ganmogoki (fried tofu dumpling); processed potato such as konnyaku (devil’s tongue jelly); salted seaweed such as ajitukenori (dried and salted seaweed); preserved vegetables like takuan(pickles); s…
Group4 Ultra-Processed foods	Ultra-processed foods are predominantly formulations manufactured from lower-cost ingredients extracted from foods (sugar, plant oils, starches, protein isolates), derived from food constituents (hydrogenated fat, modified starches) or synthetized from food substrates and/or other organic sources, like emulsifiers, artificial sweeteners, colorants, flavorings, and other additives used to imitate …		Pre-prepared dishes such as bento (e.g. one plate meal), grain dishes (e.g. onigiri (rice ball), sushi, soba noodles), Meat, fish, egg, and soy bean dishes (e.g. yakitori (grilled chicken skewers), ajihurai (deep-fried horse mackerel), chawanmushi (steamed savory cup custard)), vegetable dishes (e.g.hourensounogomaae (spinach with sesame dressing), hijikinonimono (simmered hijiki seaweed), potato…
Bold letters indicate foods peculiar to Japan.
†Moubarac,JC.,Parra,DC.,Cannon,G.,et al.(2014):Food Classification Systems Based on Food Processing:Significance and Implications for Policies and Actions:A Systematic Literature Review and Assessment. Curr Obes ,3(2),256-72.
Monteiro CA, Cannon G, Moubarac JC et al. (2018) The UN Decade of Nutrition, the NOVA food classification and the trouble with ultra-processing. Public Health Nutr 21, 5-17
